# Supplementary material for: Strongyloides stercoralis in Alcoholic Patients: Implications of Alcohol Intake in the Frequency of Infection and Parasite Load
Source: Pathogens. 2020 May 28;9(6):422. doi: 10.3390/pathogens9060422 (PMC7350291; doi:10.3390/pathogens9060422)
Supplement: Supplementary file 1 [file pathogens-09-00422-s001.pdf]

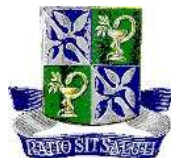**UNIVERSIDADE FEDERAL DA BAHIA****FACULDADE DE FARMÁCIA**

Departamento de Análises Clínicas e Toxicológicas

Laboratório de Pesquisa em Parasitologia

Tel.: (71) 3283-6950; 3283-6954

ID: \_\_\_\_\_

Infirmary / Bed: \_\_\_\_\_

OS: \_\_\_\_\_

Height: \_\_\_\_ cm Weight: \_\_\_\_ Kg

pName: \_\_\_\_\_ Phone: \_\_\_\_\_

ID card \_\_\_\_\_ Healthy card (SUS): \_\_\_\_\_ Date of birth: \_\_\_\_/\_\_\_\_/\_\_\_\_

Age: \_\_\_\_\_ Gender: ( ) M ( ) F Marital status: ( ) Single ( ) Married ( ) Civil union ( ) Others \_\_\_\_\_

Mother's name: \_\_\_\_\_

Address: \_\_\_\_\_

**- SOCIOECONOMIC AND SANITARY ASPECTS**

1. What is your education level?

- |                                     |                                   |                             |
|-------------------------------------|-----------------------------------|-----------------------------|
| 1. ( ) None                         | 3. ( ) Complete elementary school | 5. ( ) Complete high school |
| 2. ( ) Incomplete elementary school | 4. ( ) Incomplete high school     | 6. ( ) University education |

2. What is the total family income (per month)?

- |                        |                        |                          |
|------------------------|------------------------|--------------------------|
| 1. ( ) <1 minimum wage | 3. ( ) 3 minimum wages | 5. ( ) > 4 minimum wages |
| 2. ( ) 2 minimum wages | 4. ( ) 4 minimum wages |                          |

3. Where does the water for drinking and cooking come from?

- |                  |              |                     |
|------------------|--------------|---------------------|
| 1. ( ) Tap water | 3. ( ) Tank  | 5. ( ) Dam          |
| 2. ( ) Well      | 4. ( ) River | 6. ( ) Others _____ |

4. Boil or filter the water before drinking? ( ) Yes ( ) No ( ) Bottled water

5. Sanitary aspects:

- |                                              |         |        |
|----------------------------------------------|---------|--------|
| Is there sewage in the place where you live? | ( ) Yes | ( ) No |
| Do you have bathroom with toilet?            | ( ) Yes | ( ) No |
| Do you have a cesspool?                      | ( ) Yes | ( ) No |
| Is there a hand sink in the bathroom?        | ( ) Yes | ( ) No |
| Are the streets paved?                       | ( ) Yes | ( ) No |

6. How is garbage collection done?

- |                                                |                                              |
|------------------------------------------------|----------------------------------------------|
| ( ) All garbage is collected by the government | ( ) Other destinations                       |
| 1. ( ) Daily                                   | 1. ( ) Trash is burnt                        |
| 2. ( ) Weekly                                  | 2. ( ) Garbage is accumulated in the streets |
| 3. ( ) None                                    | 3. ( ) Garbage is accumulated in the yard    |

7. Do you walk barefoot? ( ) Yes ( ) No ( ) Sometimes

**- SIGNS OR SYMPTOMS AT HOSPITAL ADMISSION:**

1. Do you have any of the symptoms below?

- |                                |                           |                     |
|--------------------------------|---------------------------|---------------------|
| 1. ( ) Diarrhea                | 4. ( ) Nausea             | 7. ( ) Others _____ |
| 2. ( ) Intestinal constipation | 5. ( ) Vomiting           |                     |
| 3. ( ) Abdominal pain          | 6. ( ) Breathing Problems |                     |

**- SMOKE AND DRINK HABITS:**

1. Do you currently smoke tobacco? ( ) Yes ( ) No ( ) Former smoker

- If you are a smoker or ex-smoker, how long do/did you smoke? \_\_\_\_\_

2. How long have you been drinking alcohol? \_\_\_\_\_



**UNIVERSIDADE FEDERAL DA BAHIA**

**FACULDADE DE FARMÁCIA**

Departamento de Análises Clínicas e Toxicológicas

Laboratório de Pesquisa em Parasitologia

Tel.: (71) 3283-6950; 3283-6954

3. How often do you usually drink alcohol?

- ☐ Everyday                      ☐ 1-4 times/week                      ☐ Only on weekends  
☐ 1-3 times/month                      ☐ Less than once/month

4. What type of drink and how much do you usually consume per day?

- ☐ Beer \_\_\_\_\_ ☐ Distilled \_\_\_\_\_ ☐ Others \_\_\_\_\_

\*Please specify the type and number of drinks, type of glass used, and approximately the volume/quantity-per-glass, and if there is a day-to-day variation in drinking patterns.

DATE: \_\_\_\_/\_\_\_\_/\_\_\_\_ INTERVIEWER: \_\_\_\_\_ BLOOD COLLECTION TIME: \_\_\_\_\_
